# Supplementary material for: Estimating Evapotranspiration of Rainfed Winegrapes Combining Remote Sensing and the SIMDualKc Soil Water Balance Model
Source: Preprints.org preprint supplement (doi:10.20944/preprints202407.0798.v1), 2024-07-10
Supplement: Supplementary file 1 [file supplementary]

Supplementary Material_Figure S1

Figure S1. Actual evapotranspiration (ETc act), plant transpiration (Tc act), soil evaporation (Es), and precipitation (P), computed by SIMDualKc model in a rainfed vineyard, in Santarém, Portugal.
